# Supplementary material for: Optimization and Validation of a Novel Three-Dimensional Co-Culture System in Decellularized Human Liver Scaffold for the Study of Liver Fibrosis and Cancer
Source: MDPI journal article supplement (doi:10.3390/cancers13194936), 2021-09-30

Supplementary Figure  
**Figure 2A**

Whole blot showing all the bands with all molecular weight markers on the Western

**PDGF-B**

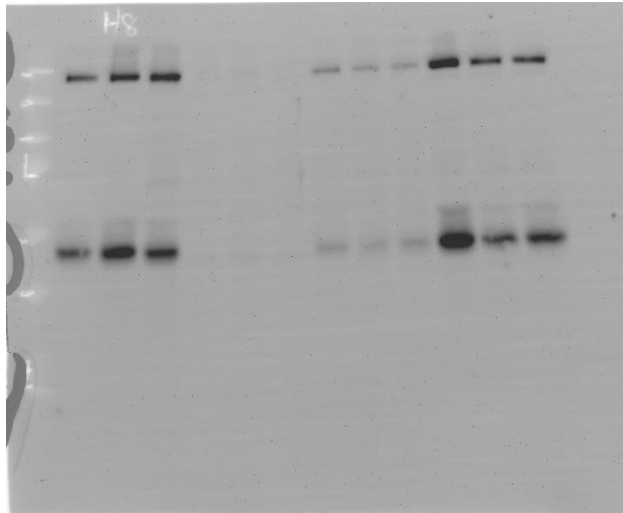

**EPCAM**

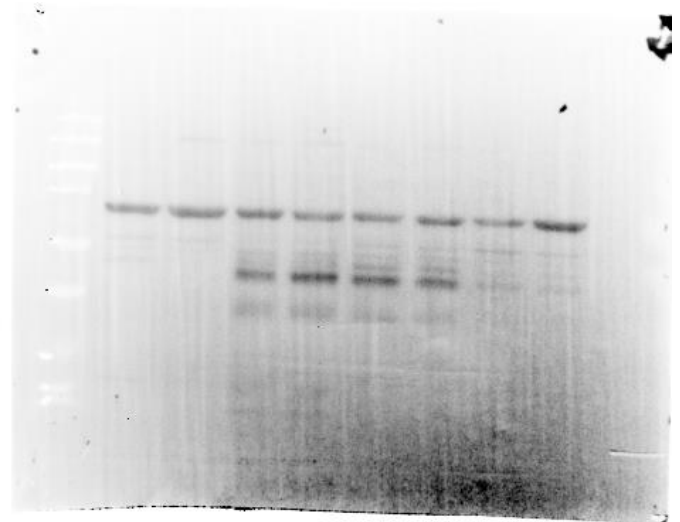

**GAPDH**

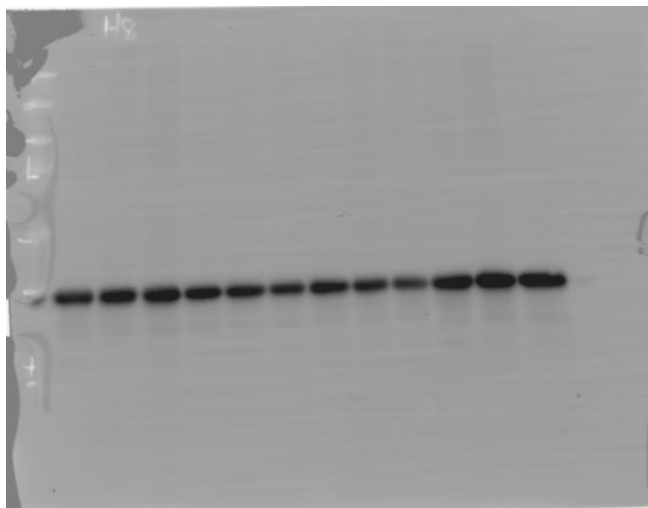

**GAPDH**

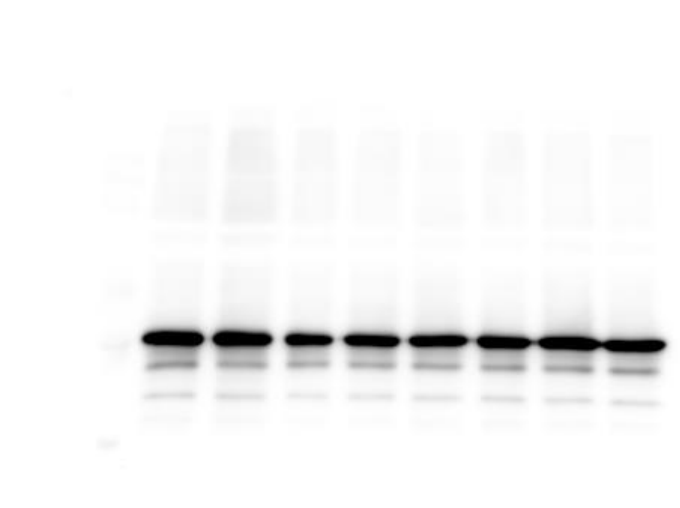

**Figure 4D (Healthy scaffold)**

**PDGF-B**

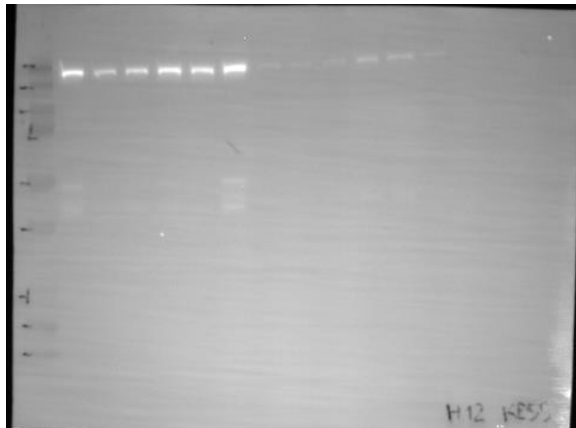

**STAT3**

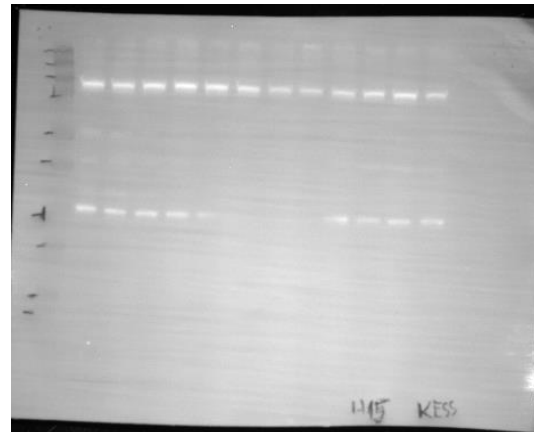

**GAPDH**

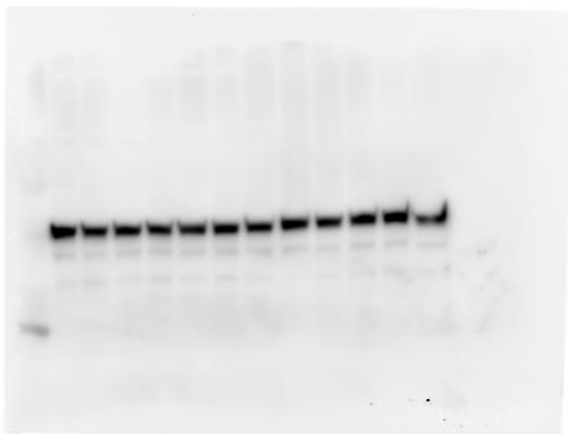

**GAPDH**

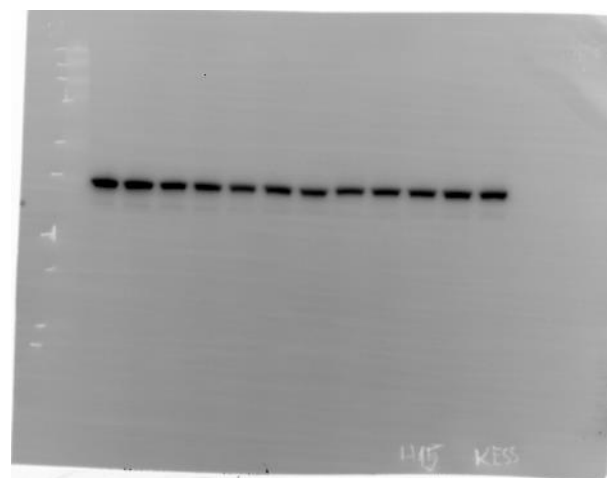

**PSTAT3**

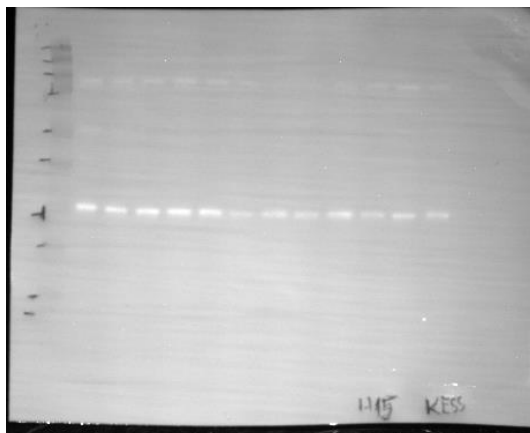

**Figure 4D (Cirrhotic scaffold)**

**PDGF-B**

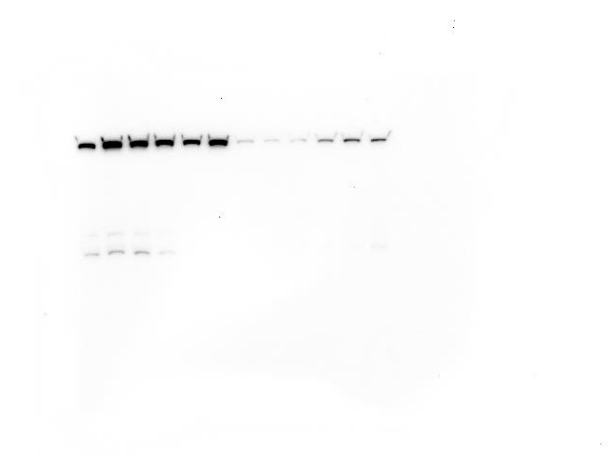

**GAPDH**

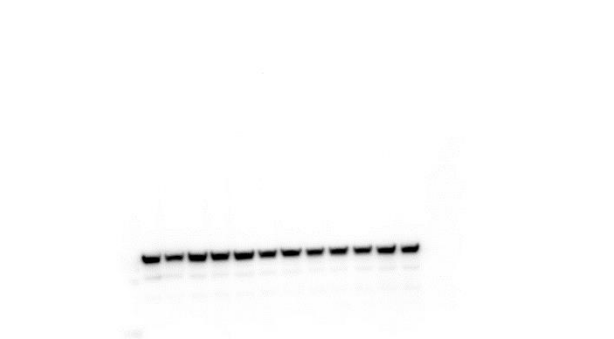

**PSTAT3**

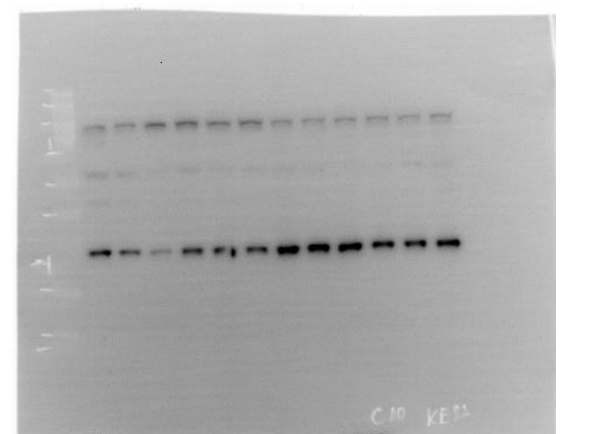

**STAT3**

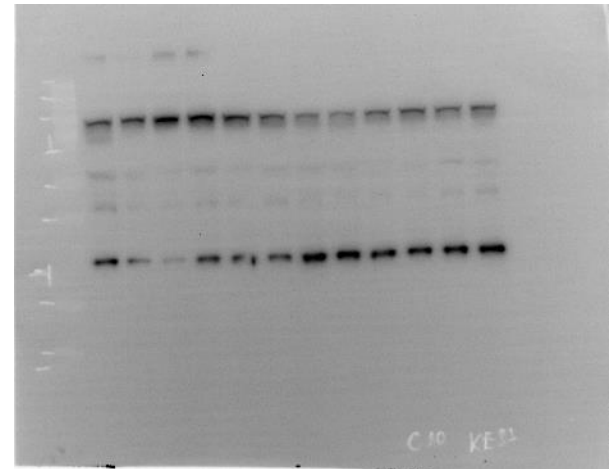

**GAPDH**

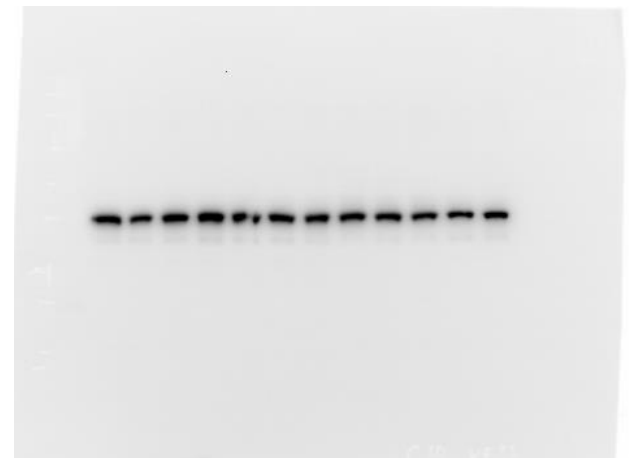

**Figure 5B**

**Cleave PARP-1**

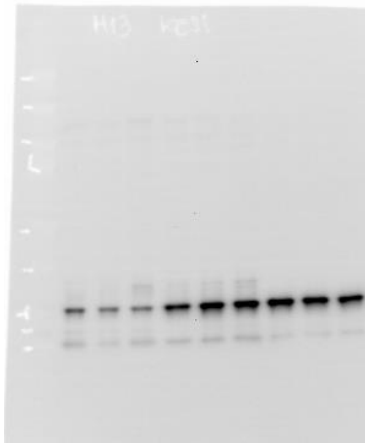

**$\alpha$ -Tubulin**

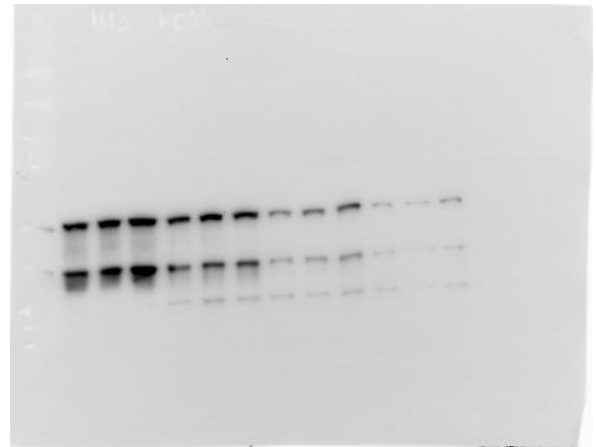

**PSTAT3**

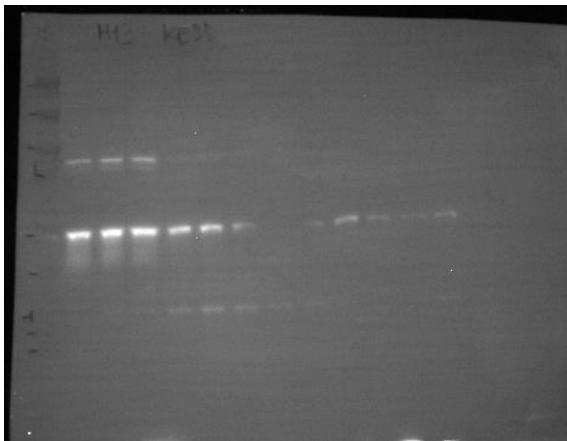

**GAPDH**

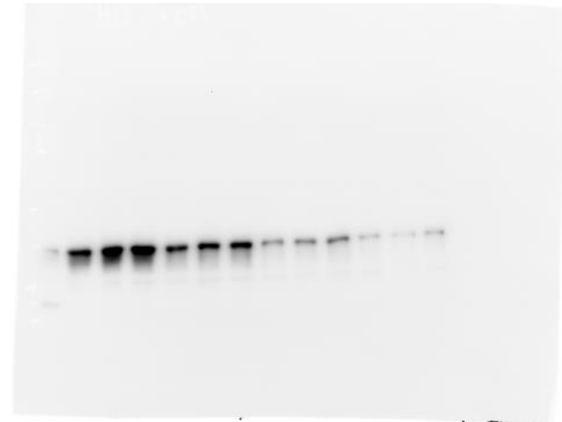

**STAT3**

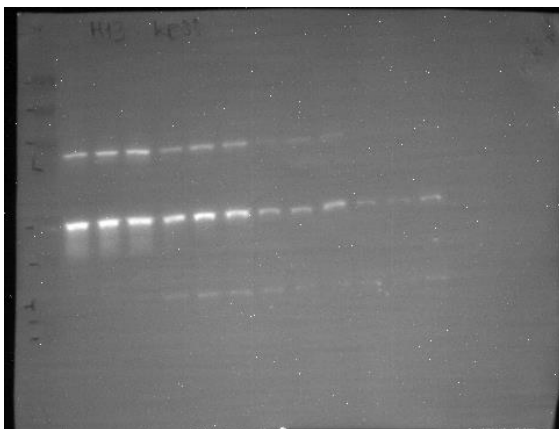

**Histone H3**

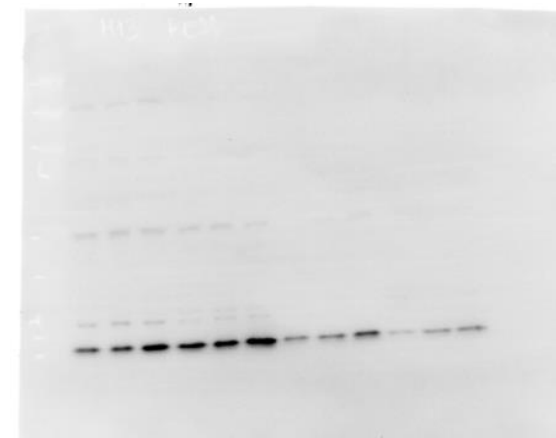

**Figure 6A**

**SHP-1**

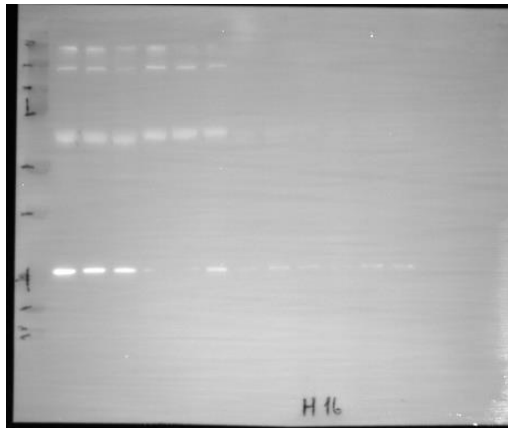

**E-cadherin**

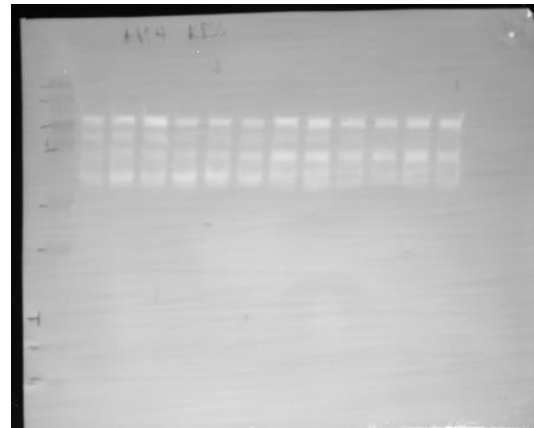

**PSTAT3**

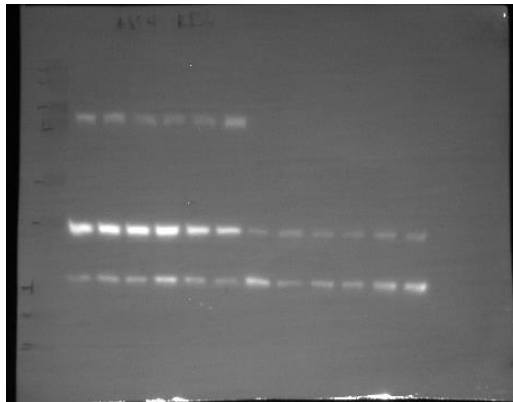

**Vimentin**

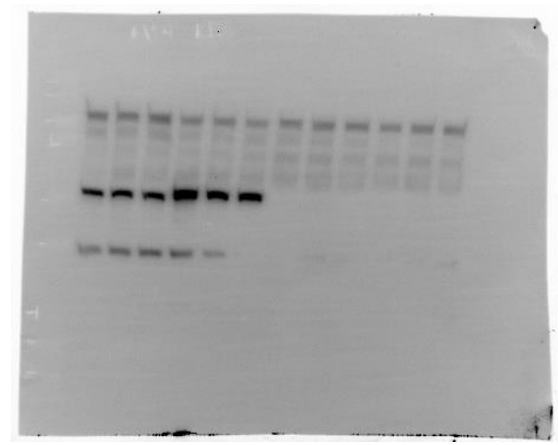

**STAT3**

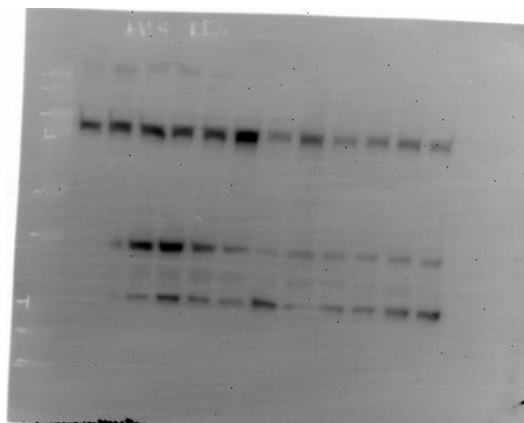

**Figure 6A (continue)**

**GAPDH**

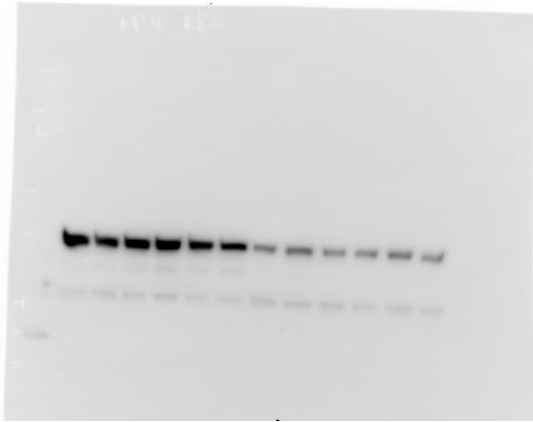

**Histone H3**

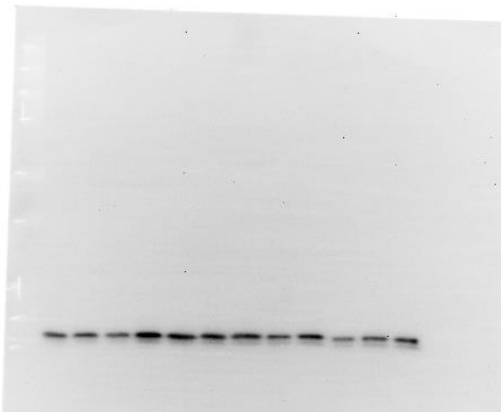

**Figure 6B**

**SHP-1**

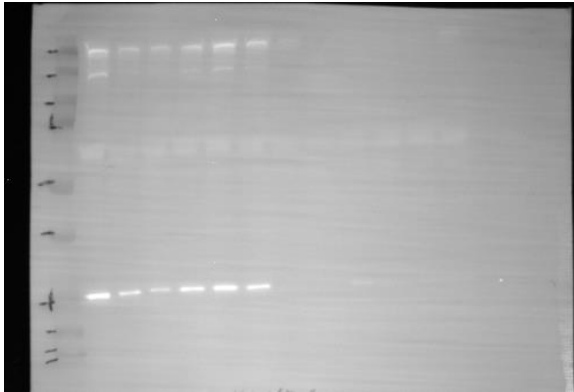

**E-cadherin**

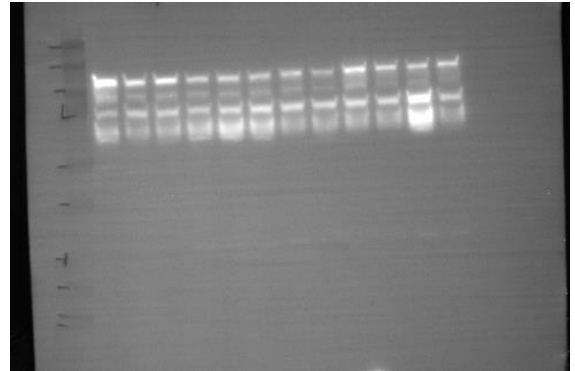

**PSTAT3**

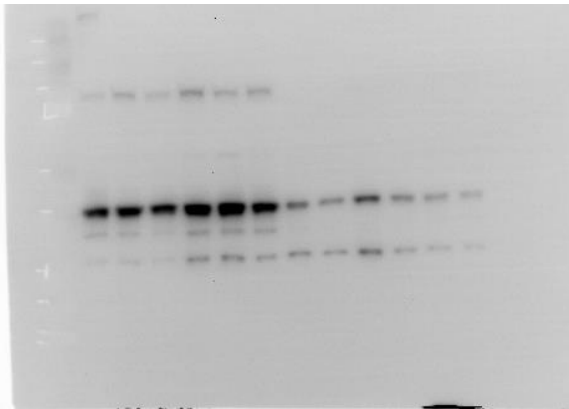

**Vimentin**

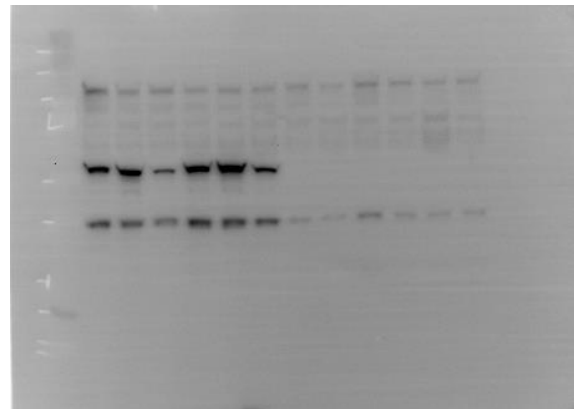

**STAT3**

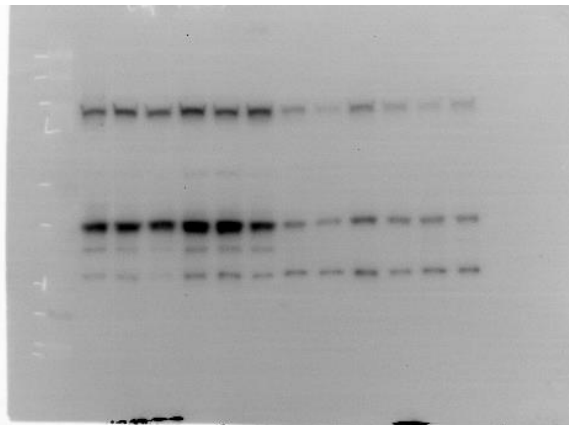

**Figure 6B (continue)**

**GAPDH**

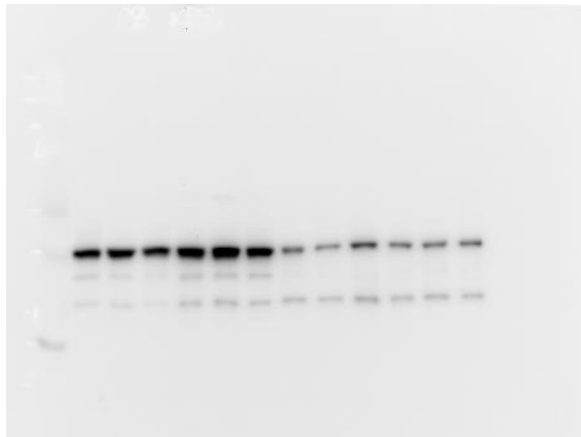

**Histone H3**

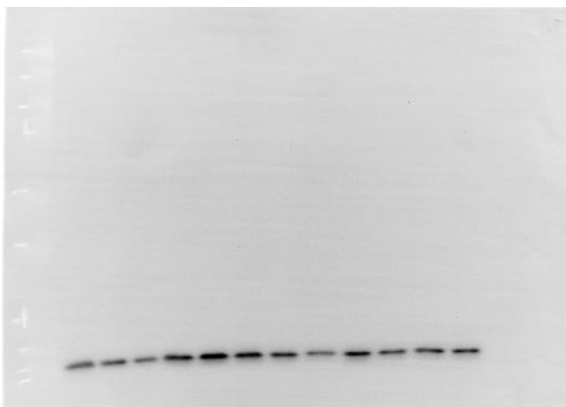



**Figure 7**

**SHP-1**

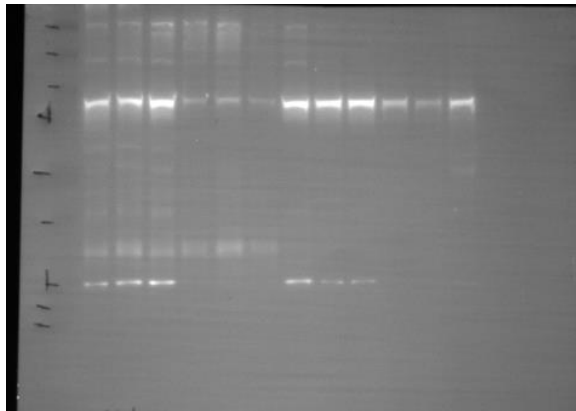

**GAPDH**

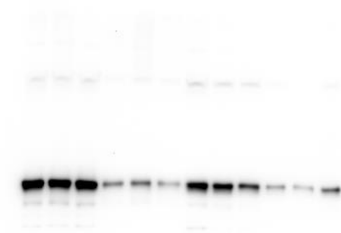

**PSTAT3**

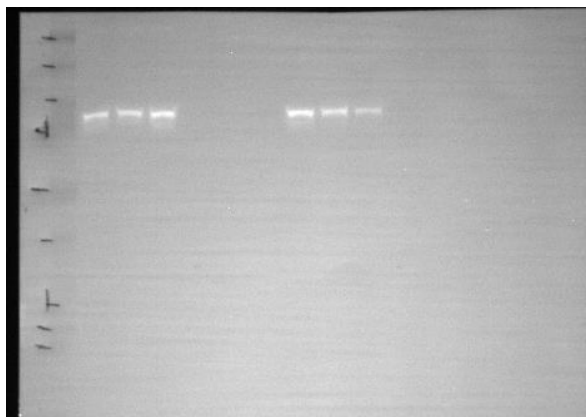

**Histone H3**

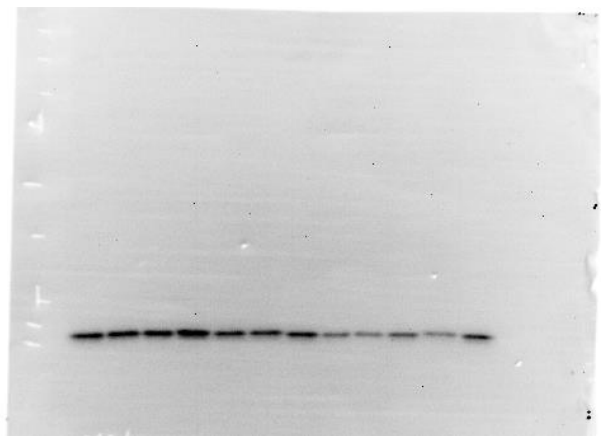

**STAT3**

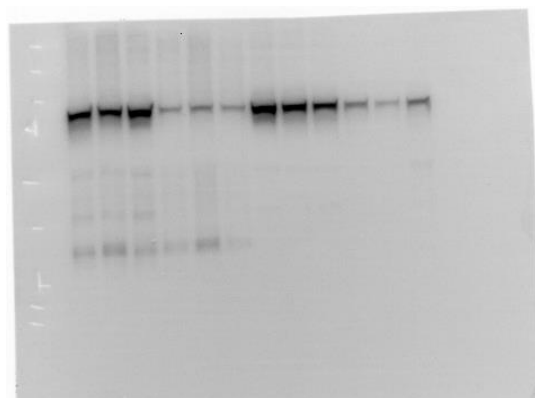

Supplement: s1 [file s1]
