# Supplementary material for: Optimization and Validation of a Novel Three-Dimensional Co-Culture System in Decellularized Human Liver Scaffold for the Study of Liver Fibrosis and Cancer
Source: MDPI journal article supplement (doi:10.3390/cancers13194936), 2021-09-30

**Supplementary table 1: Decellularization protocol**

| Type of scaffold          | Step | Solution                     | Frequency of oscillation (Hertz) | Time (minutes) | Repetitions |
|---------------------------|------|------------------------------|----------------------------------|----------------|-------------|
| <b>Healthy scaffold</b>   | 1    | Deionized water              | 20                               | 2              | 12-18       |
|                           | 2    | Phosphate buffered saline 1X | 20                               | 2              | 1-2         |
| <b>Cirrhotic scaffold</b> | 1    | Deionized water              | 30                               | 5              | 7           |
|                           | 2    | Reagent mixture              | 30                               | 5              | 2           |
|                           | 3    | Deionized water              | 30                               | 5              | 4           |
|                           | 4    | Reagent mixture              | 30                               | 5              | 2           |
|                           | 5    | Deionized water              | 30                               | 5              | 4           |
|                           | 6    | Reagent mixture              | 30                               | 5              | 2           |
|                           | 7    | Deionized water              | 30                               | 5              | 4           |
|                           | 8    | Reagent mixture              | 30                               | 5              | 2           |
|                           | 9    | Deionized water              | 30                               | 5              | 4           |
|                           | 10   | Reagent mixture              | 30                               | 5              | 2           |
|                           | 11   | Deionized water              | 30                               | 5              | 4           |
|                           | 12   | Reagent mixture              | 30                               | 5              | 2           |
|                           | 13   | Deionized water              | 30                               | 5              | 4           |
|                           | 14   | Reagent mixture              | 30                               | 5              | 2           |
|                           | 15   | Phosphate buffered saline 1X | 30                               | 5              | 5           |

**Supplementary table 2: Primary antibodies for immunohistochemistry staining**

| <b>Antibody</b>                                                | <b>Species</b> | <b>Company</b> | <b>Catalogue number</b> | <b>Dilution</b> |
|----------------------------------------------------------------|----------------|----------------|-------------------------|-----------------|
| Platelet derived growth factor receptor-beta (PDGFR- $\beta$ ) | Rabbit         | Abcam          | Ab32570                 | 1: 75           |
| Epithelial Cell Adhesion Molecule (EPCAM)                      | Rabbit         | Abcam          | Ab71916                 | 1:50            |
| Ki-67                                                          | Rabbit         | Abcam          | Ab21700                 | Pre-diluted     |

**Supplementary table 3: Applied Biosystems Taqman Gene Expression Assay.**

| <b>Gene Name</b>                                                | <b>Gene Abbreviation</b> | <b>Taqman Gene Assay No.</b> |
|-----------------------------------------------------------------|--------------------------|------------------------------|
| Albumin                                                         | ALB                      | Hs00609411_m1                |
| Alpha-fetoprotein                                               | AFP                      | Hs01040598_m1                |
| Collagen Type 1, alpha 1 chain                                  | Col1A1                   | Hs00164004_m1                |
| Collagen Type 3, alpha 1 chain                                  | Col3A1                   | Hs00943809_m1                |
| Cytochrome P450 3A4                                             | CYP3A4                   | Hs00604506_m1                |
| Fibronectin-1                                                   | FN-1                     | Hs01549976_m1                |
| Glyceraldehyde-3-phosphate dehydrogenase                        | GAPDH                    | Hs02758991_m1                |
| Hepatocyte nuclear factor 4 alpha                               | HNF4a                    | Hs00230853_m1                |
| Interleukin-6                                                   | IL-6                     | Hs00985639_m1                |
| Lysyl oxidase                                                   | LOX                      | Hs00942480_m1                |
| Platelet-derived growth factor receptor beta                    | PDGFR- $\beta$           | Hs01019589_m1                |
| Transforming growth factor, beta 1                              | TGF $\beta$ 1            | Hs00998133_m1                |
| Uridine 5'-diphospho glucuronosyltransferase family 1 member A1 | UGT1A1                   | Hs02511055_m1                |

**Supplementary table 4: Primary and secondary antibody for western blot analysis**

| Type                      | Antibody            | Species | Company                  | Dilution |
|---------------------------|---------------------|---------|--------------------------|----------|
| <b>Primary antibody</b>   | Alpha-tubulin       | Rabbit  | Cell Signaling           | 1:1,000  |
|                           | Cleaved PARP-1      | Rabbit  | Abcam                    | 1:2,500  |
|                           | E-cadherin          | Rabbit  | Cell Signaling           | 1:1,000  |
|                           | EPCAM               | Rabbit  | Abcam                    | 1:1,000  |
|                           | GAPDH               | Mouse   | Santa Cruz Biotechnology | 1:200    |
|                           | PDGFR- $\beta$      | Rabbit  | Abcam                    | 1:5,000  |
|                           | P-STAT3             | Rabbit  | Cell Signaling           | 1:1,000  |
|                           | SHP-1               | Rabbit  | Abcam                    | 1:1,000  |
|                           | STAT3               | Rabbit  | Cell Signaling           | 1:1,000  |
|                           | Vimentin            | Mouse   | Abcam                    | 1:1,000  |
|                           | Histone             | Rabbit  | Cell Signaling           | 1:1,000  |
| <b>Secondary antibody</b> | Anti-rabbit IgG HRP | Goat    | Santa Cruz Biotechnology | 1:10,000 |
|                           | Anti-mouse IgG HRP  | Goat    | Santa Cruz Biotechnology | 1:10,000 |

**Supplementary table 5: The densitometry readings/intensity ratio of studied western blot**

| Figure 2A                      | Order | Net PDGF-B/GAPDH | Net EPCAM/GAPDH  |
|--------------------------------|-------|------------------|------------------|
| <b>LX2</b>                     | 1     | 1.530471479      | 0.276075         |
|                                | 2     | 0.935325263      | 0.234582         |
|                                | 3     | 0.691017018      | -                |
| <b>HEPG2</b>                   | 1     | 0.086857978      | 0.652503         |
|                                | 2     | 0.080116802      | 0.713105         |
|                                | 3     | 0.064155385      | -                |
| <b>SimCC</b>                   | 1     | 0.434645048      | 0.766328         |
|                                | 2     | 0.172312701      | 0.785488         |
|                                | 3     | 0.26151477       | -                |
| <b>SeqCC</b>                   | 1     | 0.868664775      | 0.574125         |
|                                | 2     | 0.979548709      | 0.371595         |
|                                | 3     | 0.688862919      | -                |
|                                |       |                  |                  |
| Healthy scaffold (Figure 4D)   | Order | Net PDGF-B/GAPDH | Net PSTAT3/GAPDH |
| <b>Control</b>                 | 1     | 0.546            | 0.448534         |
|                                | 2     | 0.569774         | 0.325819         |
|                                | 3     | 0.545869         | 0.506053         |
| <b>TGF-<math>\beta</math>1</b> | 1     | 0.722312         | 0.570713         |
|                                | 2     | 0.628336         | 0.587459         |

|                                       |              |                                     |                             |
|---------------------------------------|--------------|-------------------------------------|-----------------------------|
|                                       | 3            | 0.514984                            | 0.387194                    |
| Sorafenib                             | 1            | 0.174727                            | 0.15549                     |
|                                       | 2            | 0.064897                            | 0.156268                    |
|                                       | 3            | 0.078708                            | 0.22321                     |
| TGF- $\beta$ 1 + Sorafenib            | 1            | 0.197797                            | 0.294274                    |
|                                       | 2            | 0.130617                            | 0.350418                    |
|                                       | 3            | 0.119314                            | 0.155967                    |
| <b>Cirrhotic scaffold (Figure 4D)</b> | <b>Order</b> | <b>Net PDGF-B/GAPDH</b>             | <b>Net PSTAT3/GAPDH</b>     |
| Control                               | 1            | 1.575095                            | 0.306686                    |
|                                       | 2            | 1.429771                            | 0.349057                    |
|                                       | 3            | 1.329299                            | 0.405718                    |
| TGF- $\beta$ 1                        | 1            | 1.328629                            | 0.410499                    |
|                                       | 2            | 1.23693                             | 0.471446                    |
|                                       | 3            | 0.957926                            | 0.456607                    |
| Sorafenib                             | 1            | 0.335779                            | 0.264145                    |
|                                       | 2            | 0.302115                            | 0.200761                    |
|                                       | 3            | 0.300607                            | 0.218723                    |
| TGF- $\beta$ 1 + Sorafenib            | 1            | 0.439778                            | 0.256304                    |
|                                       | 2            | 0.831272                            | 0.206496                    |
|                                       | 3            | 0.693803                            | 0.319257                    |
|                                       |              |                                     |                             |
| <b>Figure 5B</b>                      | <b>Order</b> | <b>Net cleave PARP-1/Histone H3</b> | <b>Net PSTAT3/HistoneH3</b> |
| Control                               | 1            | 1.163119                            | 0.869111                    |
|                                       | 2            | 0.888266                            | 0.992323                    |
|                                       | 3            | 0.525068                            | 0.57134                     |
| 10 $\mu$ M                            | 1            | 1.631586                            | 0.103875                    |
|                                       | 2            | 1.963694                            | 0.113145                    |
|                                       | 3            | 1.52087                             | 0.058874                    |
| 20 $\mu$ M                            | 1            | 6.683193                            | 0.02194                     |
|                                       | 2            | 5.79775                             | 0.01694                     |
|                                       | 3            | 2.998871                            | 0.01144                     |

| Healthy scaffold (Figure 6A) | Order | Net PSTAT3/Histone H3 | Net SHP-1/Histone H3 | Net E-cadherin/Histone H3 | Net Vimentin/Histone H3 |
|------------------------------|-------|-----------------------|----------------------|---------------------------|-------------------------|
| Control                      | 1     | 0.774449              | 1.91216              | 1.711508                  | 1.385469                |
|                              | 2     | 0.637865              | 1.832319             | 1.961001                  | 1.266615                |
|                              | 3     | 0.511088              | 2.242285             | 3.020526                  | 1.324894                |
| TGF- $\beta$ 1               | 1     | 0.265599              | 1.336909             | 0.711498                  | 1.70726                 |
|                              | 2     | 0.264304              | 1.536941             | 0.795431                  | 1.649943                |

|                                              |              |                              |                             |                                  |                                |
|----------------------------------------------|--------------|------------------------------|-----------------------------|----------------------------------|--------------------------------|
|                                              | 3            | 0.617372                     | 1.140336                    | 0.634874                         | 1.877293                       |
| <b>Regorafenib</b>                           | 1            | 0.00852                      | 0.194104                    | 1.579572                         | 0.016445                       |
|                                              | 2            | 0.043181                     | 0.349874                    | 2.485745                         | 0.012599                       |
|                                              | 3            | 0.00024                      | 0.16396                     | 1.507882                         | 0.015329                       |
| <b>TGF-<math>\beta</math>1 + Regorafenib</b> | 1            | 0.02289                      | 0.293735                    | 2.177803                         | 0.034472                       |
|                                              | 2            | 0.010019                     | 0.247217                    | 1.987521                         | 0.023993                       |
|                                              | 3            | 0.00112                      | 0.223675                    | 1.772502                         | 0.024936                       |
| <b>Cirrhotic Scaffold (Figure 6B)</b>        | <b>Order</b> | <b>Net PSTAT3/Histone H3</b> | <b>Net SHP-1/Histone H3</b> | <b>Net E-cadherin/Histone H3</b> | <b>Net Vimentin/Histone H3</b> |
| <b>Control</b>                               | 1            | 0.13178                      | 1.224588                    | 2.630614                         | 1.99736                        |
|                                              | 2            | 0.334                        | 0.657593                    | 1.440182                         | 2.013163                       |
|                                              | 3            | 0.234048                     | 0.893641                    | 2.317789                         | 1.201311                       |
| <b>TGF-<math>\beta</math>1</b>               | 1            | 0.416526                     | 0.545129                    | 0.519528                         | 0.0123                         |
|                                              | 2            | 0.201932                     | 0.483679                    | 0.531781                         | 0.02169                        |
|                                              | 3            | 0.290255                     | 0.424768                    | 0.527973                         | 0.00978                        |
| <b>Regorafenib</b>                           | 1            | 0.00769                      | 0.356404                    | 0.958175                         | 0.0123                         |
|                                              | 2            | 0.001189                     | 0.38885                     | 0.784613                         | 0.02169                        |
|                                              | 3            | 0.00348                      | 0.29649                     | 1.543068                         | 0.00978                        |
| <b>TGF-<math>\beta</math>1 + Regorafenib</b> | 1            | 0.010488                     | 0.464304                    | 1.495245                         | 0.01247                        |
|                                              | 2            | 0.010082                     | 0.534939                    | 1.055324                         | 0.01145                        |
|                                              | 3            | 0.00193                      | 0.461609                    | 1.230926                         | 0.00451                        |

| <b>Figure 7</b>                       | <b>Order</b> | <b>Net PSTAT3/Histone H3</b> | <b>Net SHP-1/ Histone H3</b> |
|---------------------------------------|--------------|------------------------------|------------------------------|
| <b>Control healthy scaffold</b>       | 1            | 1.592528                     | 0.294782                     |
|                                       | 2            | 1.501621                     | 0.288089                     |
|                                       | 3            | 1.812561                     | 0.266128                     |
| <b>Regorafenib healthy scaffold</b>   | 1            | 0.015527                     | -0.0094                      |
|                                       | 2            | 0.013088                     | 0.053523                     |
|                                       | 3            | 0.018406                     | 0.005491                     |
| <b>Control cirrhotic scaffold</b>     | 1            | 2.199337                     | 0.110006                     |
|                                       | 2            | 3.712782                     | 0.02515                      |
|                                       | 3            | 3.326216                     | 0.016434                     |
| <b>Regorafenib cirrhotic scaffold</b> | 1            | 0.023959                     | -0.03678                     |
|                                       | 2            | -0.0178                      | -0.01881                     |
|                                       | 3            | 0.012295                     | 0.235535                     |

**Supplementary figure    H&E staining of co-cultures repopulating the healthy and cirrhotic 3D scaffolds exposed to Regorafenib and TGF- $\beta$ 1**

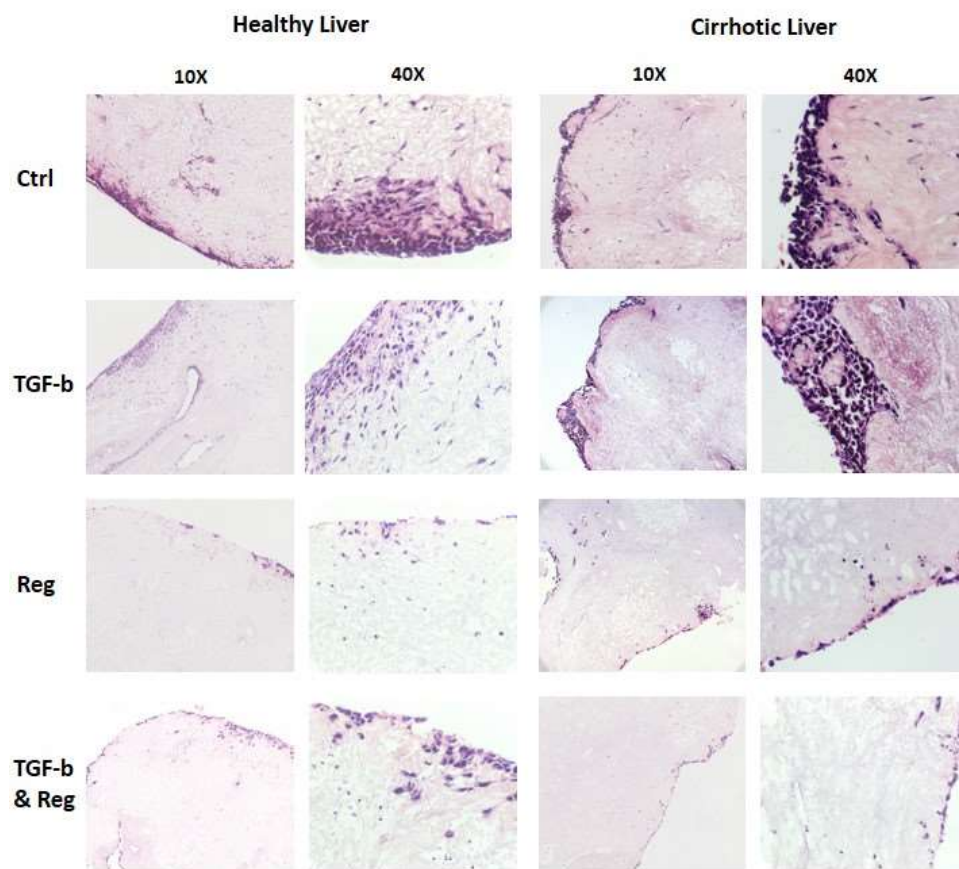

Supplement: s1 [file s1]
